# Supplementary material for: Whole Sequencing and Detailed Analysis of SARS-CoV-2 Genomes in Southeast Spain: Identification of Recurrent Mutations in the 20E (EU1) Variant with Some Clinical Implications
Source: MDPI journal article supplement (doi:10.3390/diseases11020054), 2023-03-31
Supplement: s1 [file s1]

**Table S2 (Supplementary).** Detailed information of the 88 SARS-CoV-2 sequenced genomes belonging to each sample taken from COVID-19 patients between October 2020 and April 2021 at the “Reina Sofía” Hospital (Murcia, Spain). Along the GISAID Accession ID and the SARS-CoV-2 variants detected in the study, the number of nucleotide variants is indicated on the total genome and the spike gene with regard to the reference genome (SNVs: Single Nucleotide Variants).

| Sample name | GISAID Accession ID | Nexstrain Clade | Total number of significant nucleotide variants along with its percentage on the whole genome |           |            |       | Total number of significant nucleotide variants and its percentage within spike gene |           |            |       |
|-------------|---------------------|-----------------|-----------------------------------------------------------------------------------------------|-----------|------------|-------|--------------------------------------------------------------------------------------|-----------|------------|-------|
|             |                     |                 | SNVs                                                                                          | Deletions | Insertions | %     | SNVs                                                                                 | Deletions | Insertions | %     |
| RS15        | EPI_ISL_11540720    | 20E (EU1)       | 17                                                                                            | 0         | 0          | 0.057 | 2                                                                                    | 0         | 0          | 0.052 |
| RS16        | EPI_ISL_11586307    | 20E (EU1)       | 20                                                                                            | 0         | 0          | 0.067 | 2                                                                                    | 0         | 0          | 0.052 |
| RS17        | EPI_ISL_11620933    | 20E (EU1)       | 20                                                                                            | 0         | 0          | 0.067 | 2                                                                                    | 0         | 0          | 0.052 |
| RS18        | EPI_ISL_11621374    | 20E (EU1)       | 15                                                                                            | 0         | 0          | 0.050 | 2                                                                                    | 0         | 0          | 0.052 |
| RS19        | EPI_ISL_11621478    | 20E (EU1)       | 18                                                                                            | 0         | 0          | 0.060 | 2                                                                                    | 0         | 0          | 0.052 |
| RS20        | EPI_ISL_11621901    | 20E (EU1)       | 18                                                                                            | 0         | 0          | 0.060 | 3                                                                                    | 0         | 0          | 0.079 |
| RS21        | EPI_ISL_11623510    | 20E (EU1)       | 19                                                                                            | 0         | 0          | 0.064 | 2                                                                                    | 0         | 0          | 0.052 |
| RS22        | EPI_ISL_11623527    | 20E (EU1)       | 20                                                                                            | 0         | 0          | 0.067 | 3                                                                                    | 0         | 0          | 0.079 |
| RS23        | EPI_ISL_11623867    | 20E (EU1)       | 20                                                                                            | 0         | 0          | 0.067 | 3                                                                                    | 0         | 0          | 0.079 |
| RS24        | EPI_ISL_11623868    | 20I (Alpha, V1) | 30                                                                                            | 19        | 1          | 0.167 | 7                                                                                    | 9         | 0          | 0.419 |
| RS25        | EPI_ISL_11634150    | 20E (EU1)       | 22                                                                                            | 0         | 0          | 0.074 | 4                                                                                    | 0         | 0          | 0.105 |
| RS26        | EPI_ISL_11634151    | 20E (EU1)       | 17                                                                                            | 0         | 0          | 0.057 | 3                                                                                    | 0         | 0          | 0.079 |
| RS27        | EPI_ISL_11634319    | 20E (EU1)       | 16                                                                                            | 0         | 0          | 0.054 | 2                                                                                    | 0         | 0          | 0.052 |
| RS28        | EPI_ISL_11635063    | 20A             | 17                                                                                            | 0         | 0          | 0.057 | 1                                                                                    | 0         | 0          | 0.026 |
| RS29        | EPI_ISL_11635064    | 20E (EU1)       | 21                                                                                            | 2         | 0          | 0.077 | 2                                                                                    | 0         | 0          | 0.052 |
| RS30        | EPI_ISL_11635065    | 20E (EU1)       | 17                                                                                            | 3         | 0          | 0.067 | 2                                                                                    | 0         | 0          | 0.052 |
| RS31        | EPI_ISL_11635067    | 20E (EU1)       | 20                                                                                            | 0         | 0          | 0.067 | 3                                                                                    | 0         | 0          | 0.079 |
| RS32        | EPI_ISL_11635200    | 20I (Alpha, V1) | 30                                                                                            | 19        | 0          | 0.164 | 8                                                                                    | 9         | 0          | 0.445 |
| RS33        | EPI_ISL_11635217    | 20E (EU1)       | 19                                                                                            | 0         | 0          | 0.064 | 2                                                                                    | 0         | 0          | 0.052 |
| RS34        | EPI_ISL_11635219    | 20E (EU1)       | 18                                                                                            | 2         | 0          | 0.067 | 4                                                                                    | 0         | 0          | 0.105 |
| RS35        | EPI_ISL_11635237    | 20E (EU1)       | 24                                                                                            | 0         | 0          | 0.080 | 5                                                                                    | 0         | 0          | 0.131 |
| RS36        | EPI_ISL_11637549    | 20I (Alpha, V1) | 36                                                                                            | 19        | 0          | 0.184 | 7                                                                                    | 9         | 0          | 0.419 |
| RS37        | EPI_ISL_11643426    | 20I (Alpha, V1) | 33                                                                                            | 19        | 0          | 0.174 | 7                                                                                    | 9         | 0          | 0.419 |
| RS38        | EPI_ISL_11646217    | 20E (EU1)       | 19                                                                                            | 0         | 0          | 0.064 | 5                                                                                    | 0         | 0          | 0.131 |
| RS39        | EPI_ISL_11684895    | 20I (Alpha, V1) | 34                                                                                            | 19        | 0          | 0.177 | 8                                                                                    | 9         | 0          | 0.445 |

|      |                  |                 |    |    |   |       |   |   |   |       |
|------|------------------|-----------------|----|----|---|-------|---|---|---|-------|
| RS40 | EPI_ISL_11685202 | 20E (EU1)       | 31 | 16 | 0 | 0.157 | 5 | 6 | 0 | 0.288 |
| RS41 | EPI_ISL_11685203 | 20A/S:98F       | 15 | 0  | 0 | 0.050 | 2 | 0 | 0 | 0.052 |
| RS42 | EPI_ISL_11685204 | 20E (EU1)       | 20 | 0  | 0 | 0.067 | 3 | 0 | 0 | 0.079 |
| RS43 | EPI_ISL_11685205 | 20E (EU1)       | 17 | 0  | 0 | 0.057 | 2 | 0 | 0 | 0.052 |
| RS44 | EPI_ISL_11688802 | 20E (EU1)       | 20 | 0  | 0 | 0.067 | 2 | 0 | 0 | 0.052 |
| RS45 | EPI_ISL_11690593 | 20E (EU1)       | 17 | 0  | 0 | 0.057 | 2 | 0 | 0 | 0.052 |
| RS46 | EPI_ISL_11693524 | 20E (EU1)       | 17 | 0  | 0 | 0.057 | 2 | 0 | 0 | 0.052 |
| RS47 | EPI_ISL_11696353 | 20E (EU1)       | 18 | 0  | 0 | 0.060 | 2 | 0 | 0 | 0.052 |
| RS48 | EPI_ISL_11696722 | 20E (EU1)       | 20 | 0  | 0 | 0.067 | 4 | 0 | 0 | 0.105 |
| RS49 | EPI_ISL_11696732 | 20E (EU1)       | 18 | 0  | 0 | 0.060 | 2 | 0 | 0 | 0.052 |
| RS50 | EPI_ISL_11696733 | 20E (EU1)       | 17 | 4  | 0 | 0.070 | 3 | 0 | 0 | 0.079 |
| RS51 | EPI_ISL_11696748 | 20I (Alpha, V1) | 30 | 19 | 0 | 0.164 | 8 | 9 | 0 | 0.445 |
| RS52 | EPI_ISL_11696749 | 20E (EU1)       | 19 | 0  | 0 | 0.064 | 5 | 0 | 0 | 0.131 |
| RS53 | EPI_ISL_11696750 | 20I (Alpha, V1) | 35 | 19 | 0 | 0.181 | 8 | 9 | 0 | 0.445 |
| RS54 | EPI_ISL_11696751 | 20E (EU1)       | 18 | 0  | 0 | 0.060 | 2 | 0 | 0 | 0.052 |
| RS55 | EPI_ISL_11696752 | 20E (EU1)       | 21 | 0  | 0 | 0.070 | 2 | 0 | 0 | 0.052 |
| RS56 | EPI_ISL_11728097 | 20E (EU1)       | 19 | 0  | 0 | 0.064 | 4 | 0 | 0 | 0.105 |
| RS57 | EPI_ISL_11729677 | 20A/S:98F       | 17 | 0  | 0 | 0.057 | 2 | 0 | 0 | 0.052 |
| RS58 | EPI_ISL_11731165 | 20E (EU1)       | 19 | 0  | 0 | 0.064 | 2 | 0 | 0 | 0.052 |
| RS59 | EPI_ISL_11754781 | 20E (EU1)       | 20 | 0  | 0 | 0.067 | 3 | 0 | 0 | 0.079 |
| RS60 | EPI_ISL_11754782 | 20E (EU1)       | 21 | 0  | 0 | 0.070 | 3 | 0 | 0 | 0.079 |
| RS61 | EPI_ISL_11754909 | 20E (EU1)       | 23 | 0  | 0 | 0.077 | 4 | 0 | 0 | 0.105 |
| RS62 | EPI_ISL_11755017 | 20E (EU1)       | 19 | 0  | 0 | 0.064 | 4 | 0 | 0 | 0.105 |
| RS63 | EPI_ISL_11755804 | 20E (EU1)       | 19 | 0  | 0 | 0.064 | 4 | 0 | 0 | 0.105 |
| RS64 | EPI_ISL_11757369 | 20E (EU1)       | 18 | 0  | 0 | 0.060 | 2 | 0 | 0 | 0.052 |
| RS65 | EPI_ISL_11758399 | 20A/S:98F       | 15 | 0  | 0 | 0.050 | 2 | 0 | 0 | 0.052 |
| RS66 | EPI_ISL_11760445 | 20A             | 26 | 0  | 0 | 0.087 | 5 | 0 | 0 | 0.131 |
| RS67 | EPI_ISL_11760681 | 20E (EU1)       | 18 | 9  | 0 | 0.090 | 3 | 0 | 0 | 0.079 |
| RS68 | EPI_ISL_11765428 | 20E (EU1)       | 20 | 0  | 0 | 0.067 | 3 | 0 | 0 | 0.079 |
| RS69 | EPI_ISL_11765429 | 20E (EU1)       | 20 | 0  | 0 | 0.067 | 3 | 0 | 0 | 0.079 |
| RS70 | EPI_ISL_11765430 | 20E (EU1)       | 24 | 0  | 0 | 0.080 | 2 | 0 | 0 | 0.052 |
| RS71 | EPI_ISL_11767043 | 20E (EU1)       | 21 | 0  | 0 | 0.070 | 2 | 0 | 0 | 0.052 |

|       |                  |                 |    |    |   |       |    |   |   |       |
|-------|------------------|-----------------|----|----|---|-------|----|---|---|-------|
| RS72  | EPI_ISL_11767044 | 20I (Alpha, V1) | 38 | 19 | 0 | 0.191 | 7  | 9 | 0 | 0.419 |
| RS73  | EPI_ISL_11767045 | 20E (EU1)       | 33 | 10 | 0 | 0.144 | 5  | 0 | 0 | 0.131 |
| RS74  | EPI_ISL_11767046 | 20J (Gamma, V3) | 38 | 9  | 4 | 0.171 | 13 | 0 | 0 | 0.340 |
| RS75  | EPI_ISL_11767138 | 20I (Alpha, V1) | 29 | 19 | 0 | 0.161 | 7  | 9 | 0 | 0.419 |
| RS76  | EPI_ISL_11767139 | 20I (Alpha, V1) | 36 | 19 | 0 | 0.184 | 7  | 9 | 0 | 0.419 |
| RS77  | EPI_ISL_11767140 | 20I (Alpha, V1) | 40 | 19 | 0 | 0.197 | 7  | 9 | 0 | 0.419 |
| RS78  | EPI_ISL_11767141 | 21H             | 33 | 10 | 3 | 0.154 | 9  | 0 | 3 | 0.314 |
| RS79  | EPI_ISL_11767142 | 20I (Alpha, V1) | 40 | 19 | 0 | 0.197 | 7  | 9 | 0 | 0.419 |
| RS81  | EPI_ISL_11767143 | 20E (EU1)       | 22 | 0  | 0 | 0.074 | 2  | 0 | 0 | 0.052 |
| RS82  | EPI_ISL_11767144 | 20E (EU1)       | 21 | 0  | 0 | 0.070 | 4  | 0 | 0 | 0.105 |
| RS83  | EPI_ISL_11767145 | 20E (EU1)       | 20 | 0  | 0 | 0.067 | 3  | 0 | 0 | 0.079 |
| RS84  | EPI_ISL_11767147 | 20A             | 18 | 0  | 0 | 0.060 | 2  | 0 | 0 | 0.052 |
| RS85  | EPI_ISL_11768305 | 20E (EU1)       | 16 | 0  | 0 | 0.054 | 2  | 0 | 0 | 0.052 |
| RS86  | EPI_ISL_11778143 | 20E (EU1)       | 20 | 0  | 0 | 0.067 | 2  | 0 | 0 | 0.052 |
| RS87A | EPI_ISL_11780128 | 20E (EU1)       | 18 | 0  | 0 | 0.060 | 2  | 0 | 0 | 0.052 |
| RS88  | EPI_ISL_11780263 | 20A/S:98F       | 19 | 0  | 0 | 0.064 | 4  | 0 | 0 | 0.105 |
| RS89  | EPI_ISL_11780447 | 20E (EU1)       | 17 | 0  | 0 | 0.057 | 2  | 0 | 0 | 0.052 |
| RS90  | EPI_ISL_11780673 | 20I (Alpha, V1) | 30 | 19 | 0 | 0.164 | 8  | 9 | 0 | 0.445 |
| RS91  | EPI_ISL_11781250 | 20E (EU1)       | 15 | 0  | 0 | 0.050 | 2  | 0 | 0 | 0.052 |
| RS92  | EPI_ISL_11781612 | 20E (EU1)       | 13 | 0  | 0 | 0.043 | 2  | 0 | 0 | 0.052 |
| RS93  | EPI_ISL_11782759 | 20E (EU1)       | 19 | 0  | 0 | 0.064 | 2  | 0 | 0 | 0.052 |
| RS94  | EPI_ISL_11784816 | 20E (EU1)       | 17 | 0  | 0 | 0.057 | 2  | 0 | 0 | 0.052 |
| RS95  | EPI_ISL_11785652 | 20A/S:98F       | 16 | 0  | 0 | 0.054 | 2  | 0 | 0 | 0.052 |
| RS96  | EPI_ISL_11793412 | 20E (EU1)       | 16 | 0  | 0 | 0.054 | 2  | 0 | 0 | 0.052 |
| RS97  | EPI_ISL_11793789 | 20E (EU1)       | 18 | 0  | 0 | 0.060 | 2  | 0 | 0 | 0.052 |
| RS98  | EPI_ISL_11794338 | 20A/S:98F       | 16 | 0  | 0 | 0.054 | 2  | 0 | 0 | 0.052 |
| RS99  | EPI_ISL_11794355 | 20E (EU1)       | 17 | 0  | 0 | 0.057 | 2  | 0 | 0 | 0.052 |
| RS100 | EPI_ISL_11794357 | 20C             | 20 | 0  | 0 | 0.067 | 2  | 0 | 0 | 0.052 |
| RS101 | EPI_ISL_11794379 | 20E (EU1)       | 17 | 0  | 0 | 0.057 | 4  | 0 | 0 | 0.105 |
| RS102 | EPI_ISL_11794519 | 20E (EU1)       | 17 | 0  | 0 | 0.057 | 2  | 0 | 0 | 0.052 |
| RS103 | EPI_ISL_11794610 | 20E (EU1)       | 14 | 0  | 0 | .047  | 2  | 0 | 0 | 0.052 |
