# Supplementary material for: Whole Sequencing and Detailed Analysis of SARS-CoV-2 Genomes in Southeast Spain: Identification of Recurrent Mutations in the 20E (EU1) Variant with Some Clinical Implications
Source: MDPI journal article supplement (doi:10.3390/diseases11020054), 2023-03-31
Supplement: s1 [file s1]

**Table S1 (Supplementary).** Detailed information of the 88 SARS-CoV-2 sequenced genomes belonging to each sample taken from COVID-19 patients between October 2020 and April 2021 at the “Reina Sofía” Hospital (Murcia, Spain). Along the GISAID Accession ID and the SARS-CoV-2 variants detected in the study, the sequencing coverage and the percentage of sequenced bases are indicated in addition to the clinical data of the patients.

| Sample name | GISAID Accession ID | Nexstrain Clade | % of non-N bases | Median Coverage | Collection date of the sample | Gender | Patient age | Disease severity (WHO 1-7 scale) |
|-------------|---------------------|-----------------|------------------|-----------------|-------------------------------|--------|-------------|----------------------------------|
| RS15        | EPI_ISL_11540720    | 20E (EU1)       | 99.71%           | 1,360x          | 2021-01-15                    | Female | 69          | 5                                |
| RS16        | EPI_ISL_11586307    | 20E (EU1)       | 99.72%           | 1,265x          | 2021-01-18                    | Male   | 72          | 7                                |
| RS17        | EPI_ISL_11620933    | 20E (EU1)       | 99.74%           | 1,873x          | 2021-01-29                    | Male   | 58          | 6                                |
| RS18        | EPI_ISL_11621374    | 20E (EU1)       | 98.98%           | 1,383x          | 2020-10-25                    | Male   | 79          | 7                                |
| RS19        | EPI_ISL_11621478    | 20E (EU1)       | 99.71%           | 1,715x          | 2021-01-18                    | Female | 84          | 7                                |
| RS20        | EPI_ISL_11621901    | 20E (EU1)       | 99.72%           | 1,359x          | 2020-12-28                    | Male   | 86          | 7                                |
| RS21        | EPI_ISL_11623510    | 20E (EU1)       | 98.19%           | 1,313x          | 2021-01-07                    | Female | 77          | 5                                |
| RS22        | EPI_ISL_11623527    | 20E (EU1)       | 99.72%           | 1,588x          | 2021-01-28                    | Male   | 46          | 5                                |
| RS23        | EPI_ISL_11623867    | 20E (EU1)       | 99.72%           | 1,741x          | 2021-02-11                    | Female | 77          | 7                                |
| RS24        | EPI_ISL_11623868    | 20I (Alpha, V1) | 99.70%           | 1,099x          | 2021-02-24                    | Male   | 82          | 7                                |
| RS25        | EPI_ISL_11634150    | 20E (EU1)       | 99.71%           | 1,404x          | 2020-12-12                    | Male   | 53          | 4                                |
| RS26        | EPI_ISL_11634151    | 20E (EU1)       | 99.72%           | 1,486x          | 2020-12-18                    | Female | 58          | 4                                |
| RS27        | EPI_ISL_11634319    | 20E (EU1)       | 99.74%           | 1,546x          | 2020-12-31                    | Male   | 77          | 1                                |
| RS28        | EPI_ISL_11635063    | 20A             | 99.72%           | 1,825x          | 2021-01-01                    | Female | 65          | 3                                |
| RS29        | EPI_ISL_11635064    | 20E (EU1)       | 99.72%           | 1,544x          | 2021-01-11                    | Female | 47          | 1                                |
| RS30        | EPI_ISL_11635065    | 20E (EU1)       | 99.71%           | 1,628x          | 2021-01-17                    | Female | 75          | 4                                |
| RS31        | EPI_ISL_11635067    | 20E (EU1)       | 99.72%           | 1,824x          | 2021-02-09                    | Male   | 91          | 3                                |
| RS32        | EPI_ISL_11635200    | 20I (Alpha, V1) | 99.72%           | 1,815x          | 2021-02-10                    | Male   | 83          | 4                                |
| RS33        | EPI_ISL_11635217    | 20E (EU1)       | 99.72%           | 1,757x          | 2021-01-04                    | Female | 78          | 4                                |
| RS34        | EPI_ISL_11635219    | 20E (EU1)       | 84.45%           | 303x            | 2021-03-04                    | Male   | 84          | 4                                |
| RS35        | EPI_ISL_11635237    | 20E (EU1)       | 98.89%           | 900x            | 2021-03-11                    | Female | 76          | 5                                |
| RS36        | EPI_ISL_11637549    | 20I (Alpha, V1) | 99.72%           | 1,643x          | 2021-03-13                    | Female | 17          | 1                                |
| RS37        | EPI_ISL_11643426    | 20I (Alpha, V1) | 99.72%           | 1,533x          | 2021-03-23                    | Female | 63          | 2                                |
| RS38        | EPI_ISL_11646217    | 20E (EU1)       | 99.72%           | 1,338x          | 2021-03-29                    | Female | 80          | 4                                |
| RS39        | EPI_ISL_11684895    | 20I (Alpha, V1) | 99.75%           | 1,565x          | 2021-03-30                    | Male   | 38          | 1                                |
| RS40        | EPI_ISL_11685202    | 20E (EU1)       | 99.73%           | 1,355x          | 2021-04-05                    | Male   | 40          | 2                                |
| RS41        | EPI_ISL_11685203    | 20A/S:98F       | 99.73%           | 875x            | 2021-01-25                    | Female | 63          | 7                                |

|      |                  |                 |        |        |            |        |    |   |
|------|------------------|-----------------|--------|--------|------------|--------|----|---|
| RS42 | EPI_ISL_11685204 | 20E (EU1)       | 99.71% | 1,559x | 2021-01-15 | Male   | 77 | 7 |
| RS43 | EPI_ISL_11685205 | 20E (EU1)       | 98.98% | 1,211x | 2021-01-27 | Male   | 61 | 7 |
| RS44 | EPI_ISL_11688802 | 20E (EU1)       | 99.72% | 1,463x | 2021-01-27 | Female | 57 | 5 |
| RS45 | EPI_ISL_11690593 | 20E (EU1)       | 82.13% | 506x   | 2021-01-29 | Male   | 69 | 7 |
| RS46 | EPI_ISL_11693524 | 20E (EU1)       | 99.71% | 1,206x | 2021-01-29 | Male   | 86 | 7 |
| RS47 | EPI_ISL_11696353 | 20E (EU1)       | 99.74% | 1,312x | 2021-02-04 | Male   | 71 | 7 |
| RS48 | EPI_ISL_11696722 | 20E (EU1)       | 99.72% | 1,064x | 2021-01-24 | Female | 77 | 4 |
| RS49 | EPI_ISL_11696732 | 20E (EU1)       | 99.70% | 1,390x | 2021-01-29 | Male   | 84 | 5 |
| RS50 | EPI_ISL_11696733 | 20E (EU1)       | 99.71% | 1,147x | 2021-02-03 | Male   | 75 | 4 |
| RS51 | EPI_ISL_11696748 | 20I (Alpha, V1) | 99.72% | 1,380x | 2021-02-19 | Female | 65 | 4 |
| RS52 | EPI_ISL_11696749 | 20E (EU1)       | 99.74% | 1,352x | 2021-03-23 | Female | 80 | 4 |
| RS53 | EPI_ISL_11696750 | 20I (Alpha, V1) | 99.73% | 1,418x | 2021-03-24 | Female | 36 | 1 |
| RS54 | EPI_ISL_11696751 | 20E (EU1)       | 99.72% | 1,377x | 2021-01-04 | Male   | 23 | 1 |
| RS55 | EPI_ISL_11696752 | 20E (EU1)       | 99.76% | 1,448x | 2021-01-05 | Female | 36 | 1 |
| RS56 | EPI_ISL_11728097 | 20E (EU1)       | 99.72% | 1,341x | 2021-01-05 | Female | 27 | 1 |
| RS57 | EPI_ISL_11729677 | 20A/S:98F       | 99.75% | 1,382x | 2021-01-05 | Female | 31 | 1 |
| RS58 | EPI_ISL_11731165 | 20E (EU1)       | 99.72% | 1,585x | 2021-01-12 | Male   | 60 | 1 |
| RS59 | EPI_ISL_11754781 | 20E (EU1)       | 99.72% | 1,345x | 2021-01-12 | Female | 68 | 2 |
| RS60 | EPI_ISL_11754782 | 20E (EU1)       | 99.71% | 1,302x | 2021-01-13 | Female | 50 | 1 |
| RS61 | EPI_ISL_11754909 | 20E (EU1)       | 99.72% | 1,517x | 2021-01-14 | Female | 25 | 4 |
| RS62 | EPI_ISL_11755017 | 20E (EU1)       | 99.72% | 1,295x | 2021-01-14 | Female | 61 | 2 |
| RS63 | EPI_ISL_11755804 | 20E (EU1)       | 99.72% | 1,273x | 2021-01-15 | Male   | 45 | 3 |
| RS64 | EPI_ISL_11757369 | 20E (EU1)       | 99.73% | 1,337x | 2021-01-16 | Male   | 86 | 4 |
| RS65 | EPI_ISL_11758399 | 20A/S:98F       | 99.72% | 1,416x | 2021-01-19 | Male   | 81 | 3 |
| RS66 | EPI_ISL_11760445 | 20A             | 99.72% | 1,063x | 2021-01-19 | Female | 47 | 4 |
| RS67 | EPI_ISL_11760681 | 20E (EU1)       | 99.71% | 1,239x | 2021-01-19 | Male   | 35 | 3 |
| RS68 | EPI_ISL_11765428 | 20E (EU1)       | 99.71% | 1,333x | 2021-01-19 | Male   | 25 | 1 |
| RS69 | EPI_ISL_11765429 | 20E (EU1)       | 99.71% | 1,343x | 2021-01-19 | Male   | 25 | 1 |
| RS70 | EPI_ISL_11765430 | 20E (EU1)       | 99.71% | 1,198x | 2021-02-01 | Female | 72 | 4 |
| RS71 | EPI_ISL_11767043 | 20E (EU1)       | 99.35% | 1,382x | 2021-01-25 | Male   | 49 | 1 |
| RS72 | EPI_ISL_11767044 | 20I (Alpha, V1) | 99.73% | 1,253x | 2021-04-10 | Male   | 45 | 1 |
| RS73 | EPI_ISL_11767045 | 20E (EU1)       | 99.72% | 1,320x | 2021-04-12 | Male   | 38 | 3 |

|       |                  |                 |        |        |            |        |    |   |
|-------|------------------|-----------------|--------|--------|------------|--------|----|---|
| RS74  | EPI_ISL_11767046 | 20J (Gamma, V3) | 99.75% | 1,511x | 2021-04-12 | Female | 52 | 1 |
| RS75  | EPI_ISL_11767138 | 20I (Alpha, V1) | 99.72% | 1,333x | 2021-04-12 | Female | 28 | 1 |
| RS76  | EPI_ISL_11767139 | 20I (Alpha, V1) | 99.72% | 1,514x | 2021-04-12 | Female | 43 | 1 |
| RS77  | EPI_ISL_11767140 | 20I (Alpha, V1) | 99.73% | 1,547x | 2021-04-12 | Male   | 44 | 1 |
| RS78  | EPI_ISL_11767141 | 21H             | 99.72% | 1,411x | 2021-04-12 | Male   | 23 | 1 |
| RS79  | EPI_ISL_11767142 | 20I (Alpha, V1) | 99.72% | 1,480x | 2021-04-12 | Female | 45 | 1 |
| RS81  | EPI_ISL_11767143 | 20E (EU1)       | 99.72% | 1,376x | 2021-02-07 | Male   | 59 | 1 |
| RS82  | EPI_ISL_11767144 | 20E (EU1)       | 99.72% | 1,524x | 2021-01-26 | Male   | 58 | 1 |
| RS83  | EPI_ISL_11767145 | 20E (EU1)       | 99.71% | 1,272x | 2021-01-19 | Female | 53 | 1 |
| RS84  | EPI_ISL_11767147 | 20A             | 99.72% | 1,325x | 2021-01-20 | Female | 40 | 1 |
| RS85  | EPI_ISL_11768305 | 20E (EU1)       | 99.71% | 1,250x | 2020-10-30 | Male   | 41 | 6 |
| RS86  | EPI_ISL_11778143 | 20E (EU1)       | 99.73% | 1,447x | 2020-12-31 | Male   | 74 | 1 |
| RS87A | EPI_ISL_11780128 | 20E (EU1)       | 99.72% | 1,342x | 2021-01-01 | Male   | 67 | 7 |
| RS88  | EPI_ISL_11780263 | 20A/S:98F       | 99.73% | 1,212x | 2021-01-05 | Male   | 75 | 1 |
| RS89  | EPI_ISL_11780447 | 20E (EU1)       | 99.72% | 1,379x | 2021-01-20 | Male   | 71 | 1 |
| RS90  | EPI_ISL_11780673 | 20I (Alpha, V1) | 99.75% | 1,222x | 2021/02/07 | Male   | 68 | 1 |
| RS91  | EPI_ISL_11781250 | 20E (EU1)       | 99.72% | 1,180x | 2020/10/20 | Female | 85 | 4 |
| RS92  | EPI_ISL_11781612 | 20E (EU1)       | 97.68% | 1,263x | 2020/10/17 | Male   | 59 | 5 |
| RS93  | EPI_ISL_11782759 | 20E (EU1)       | 98.95% | 1,761x | 2021/01/27 | Female | 51 | 1 |
| RS94  | EPI_ISL_11784816 | 20E (EU1)       | 98.85% | 1,321x | 2021/02/04 | Male   | 76 | 6 |
| RS95  | EPI_ISL_11785652 | 20A/S:98F       | 99.35% | 1,328x | 2021/01/21 | Male   | 52 | 5 |
| RS96  | EPI_ISL_11793412 | 20E (EU1)       | 98.39% | 1,152x | 2021/02/10 | Female | 92 | 4 |
| RS97  | EPI_ISL_11793789 | 20E (EU1)       | 99.32% | 1,477x | 2021/01/28 | Male   | 80 | 1 |
| RS98  | EPI_ISL_11794338 | 20A/S:98F       | 97.52% | 1,190x | 2020/10/14 | Female | 89 | 3 |
| RS99  | EPI_ISL_11794355 | 20E (EU1)       | 99.47% | 1,245x | 2021/02/02 | Female | 69 | 5 |
| RS100 | EPI_ISL_11794357 | 20C             | 98.57% | 1,369x | 2020/10/29 | Male   | 55 | 4 |
| RS101 | EPI_ISL_11794379 | 20E (EU1)       | 98.70% | 1,726x | 2020/10/17 | Male   | 29 | 1 |
| RS102 | EPI_ISL_11794519 | 20E (EU1)       | 99.71% | 1,605x | 2021/01/19 | Female | 83 | 1 |
| RS103 | EPI_ISL_11794610 | 20E (EU1)       | 98.20% | 867x   | 2020/10/21 | Female | 60 | 2 |
